# Supplementary material for: Naringenin Protects Hepato-Renal Tissues Against Antituberculosis Drugs Induced Toxic Manifestations by Modulating IL-6, IGF-1, CYP2E1, Biochemical and Ultra-Structural Integrity
Source: Research Square preprint supplement (doi:10.21203/rs.3.rs-934724/v1), 2021-10-29
Supplement: Supplementary file 1 [file 499e6386540c5f4cf918fc38.xlsx]

## Sheet: Sheet1
Glucose					Average mean		G/N=	85.6714														F Critical value ANOVA 2.5336
	1	2	3	4	5	6	Cal mean	Mean	SD	SE	0.05	0.1	p value				% Protection	SS total	SS within	SS between	MS between	MS within	Anova F value	Tukey Q value
Control	95.232	86.304	114.08	110.112	89.28	100.192	99.2	99.2	11.1528	4.9877	4.96	9.92						1720.06	621.928	1098.13	183.022	17.7694	15.8252	16.3296
Naringenin Per se	114.425	89.55	86.565	100.495	95.52	110.445	99.5	99.5	11.1866	5.00278	4.975	9.95	-0.0424668	-0.3	49.905	7.06434		1773.07	625.696	1147.38	191.229	17.877
ATD	60.297	51.939	66.267	53.73	57.312	68.655	59.7	59.7	6.71194	3.00167	2.985	5.97	6.78546	39.5	33.8872	5.82127		4272.34	225.25	4047.09	674.515	6.43573
ATD +Naringenin 10 mg	62.19	60.117	66.336	69.791	76.701	79.465	69.1	69.1	7.76876	3.47429	3.455	6.91	-2.04732	-9.4	21.0807	4.59138	23.7975	1949.44	301.768	1647.67	274.612	8.62194
ATD +Naringenin 20 mg	95.91	72.558	75.06	92.574	84.234	80.064	83.4	83.4	9.37647	4.19329	4.17	8.34	-4.59578	-23.7	26.5937	5.15691	60	470.548	439.591	30.9563	5.15939	12.5598
ATD +Naringenin 40 mg	99.283	88.47	109.113	85.521	113.045	94.368	98.3	98.3	11.0516	4.94245	4.915	9.83	0.170637	1.2	49.4556	7.03247	97.7215	1567.58	610.695	956.885	159.481	17.4484
ATD +Silymarin 50 mg	78.735	100.455	91.405	86.88	81.45	104.075	90.5	90.5	10.1747	4.55027	4.525	9.05	-5.65019	-30.8	29.715	5.45114	77.9747	657.514	517.624	139.891	23.3151	14.7893
	TUKEY HSD ANALYSIS
Symbols	Groups comparison		Mean Difference		Square root	Q value	Results
*	Control Vs Toxicant		39.5		39.5	16.3296	*significant
	Control Vs per se		-0.3		0.3	16.3296	not significant
α	Control Vs Therapy 1		30.1		30.1	16.3296	*significant
α	Control Vs Therapy 2		15.8		15.8	16.3296	not significant
α	Control Vs Therapy 3		0.9		0.9	16.3296	not significant
α	Control Vs Therapy 4		8.7		8.7	16.3296	not significant
φ	Therapy 1 Vs Therapy 2		-14.3		14.3	16.3296	not significant
φ	Therapy 1 Vs Therapy 3		-29.2		29.2	16.3296	*significant
φ	Therapy 1 Vs Therapy 4		-21.4		21.4	16.3296	*significant
λ	Therapy 2 Vs Therapy 3		-14.9		14.9	16.3296	not significant
λ	Therapy 2 Vs Therapy 4		-7.1		7.1	16.3296	not significant
Ω	Therapy 3 Vs Therapy 4		7.8		7.8	16.3296	not significant
Ѱ	Toxicant Vs Therapy 1		-9.4		9.4	16.3296	not significant
Ѱ	Toxicant Vs Therapy 2		-23.7		23.7	16.3296	*significant
Ѱ	Toxicant Vs Therapy 3		-38.6		38.6	16.3296	*significant
Ѱ	Toxicant Vs Therapy 4		-30.8		30.8	16.3296	*significant
Triglycerides					Average mean		G/N=	50.2429														F Critical value ANOVA 2.5336
	1	2	3	4	5	6	Cal mean	Mean	SD	SE	0.05	0.1	p value				% Protection	SS total	SS within	SS between	MS between	MS within	Anova F value	Tukey Q value
Control	33.431	28.797	29.79	36.741	31.776	38.065	33.1	33.1	3.72136	1.66424	1.655	3.31						1832.51	69.2426	1763.27	293.878	1.97836	36.2694	9.764
Naringenin Per se	30.78	32.832	29.754	37.962	34.542	39.33	34.2	34.2	3.84503	1.71955	1.71	3.42	-0.45967	-1.1	5.72655	2.39302		1618.16	73.9212	1544.24	257.373	2.11204
ATD	85.445	82.473	71.328	64.641	75.043	66.87	74.3	74.3	8.35338	3.73575	3.715	7.43	-10.0741	-41.2	16.7255	4.08968		3821.37	348.895	3472.48	578.746	9.96843
ATD +Naringenin 10 mg	66.815	55.776	50.547	64.491	58.681	52.29	58.1	58.1	6.53205	2.92122	2.905	5.81	3.41607	16.2	22.4893	4.74229	39.3204	583.747	213.339	370.408	61.7347	6.09539
ATD +Naringenin 20 mg	47.154	48.78	60.162	54.742	62.33	52.032	54.2	54.2	6.09358	2.72513	2.71	5.42	4.34681	20.1	21.3822	4.62408	48.7864	279.613	185.659	93.9539	15.659	5.30454
ATD +Naringenin 40 mg	60.49	45.762	58.386	53.126	50.496	47.34	52.6	52.6	5.9137	2.64469	2.63	5.26	-5.83283	-18.4	9.95122	3.15456	52.6699	208.196	174.859	33.3367	5.55612	4.99598
ATD +Silymarin 50 mg	40.68	45.652	39.324	51.98	50.172	43.392	45.2	45.2	5.08173	2.27262	2.26	4.52	6.65491	29.1	19.1206	4.37271	70.6311	281.703	129.12	152.582	25.4304	3.68915
	TUKEY HSD ANALYSIS
Symbols	Groups comparison		Mean Difference		Square root	Q value	Results
*	Control Vs Toxicant		-41.2		41.2	9.764	*significant
	Control Vs per se		-1.1		1.1	9.764	not significant
α	Control Vs Therapy 1		-25		25	9.764	*significant
α	Control Vs Therapy 2		-21.1		21.1	9.764	*significant
α	Control Vs Therapy 3		-19.5		19.5	9.764	*significant
α	Control Vs Therapy 4		-12.1		12.1	9.764	*significant
φ	Therapy 1 Vs Therapy 2		3.9		3.9	9.764	not significant
φ	Therapy 1 Vs Therapy 3		5.5		5.5	9.764	not significant
φ	Therapy 1 Vs Therapy 4		12.9		12.9	9.764	*significant
λ	Therapy 2 Vs Therapy 3		1.6		1.6	9.764	not significant
λ	Therapy 2 Vs Therapy 4		9		9	9.764	not significant
Ω	Therapy 3 Vs Therapy 4		7.4		7.4	9.764	not significant
Ѱ	Toxicant Vs Therapy 1		16.2		16.2	9.764	*significant
Ѱ	Toxicant Vs Therapy 2		20.1		20.1	9.764	*significant
Ѱ	Toxicant Vs Therapy 3		21.7		21.7	9.764	*significant
Ѱ	Toxicant Vs Therapy 4		29.1		29.1	9.764	*significant
Cholesterol					Average mean		G/N=	31.7286														F Critical value ANOVA 2.5336
	1	2	3	4	5	6	Cal mean	Mean	SD	SE	0.05	0.1	p value				% Protection	SS total	SS within	SS between	MS between	MS within	Anova F value	Tukey Q value
Control	14.688	13.311	13.77	15.453	16.983	17.595	15.3	15.3	1.72014	0.769272	0.765	1.53						1634.18	14.7945	1619.39	269.898	0.4227	103.942	6.61355
Naringenin Per se	14.976	17.316	17.94	15.756	14.04	13.572	15.6	15.6	1.75387	0.784356	0.78	1.56	-0.273067	-0.3	1.20699	1.09863		1576.17	15.3804	1560.78	260.131	0.439439
ATD	66.93	55.872	52.38	50.634	64.602	58.782	58.2	58.2	6.5433	2.92625	2.91	5.82	-14.1786	-42.9	9.15472	3.02568		4418.49	214.074	4204.42	700.737	6.11639
ATD +Naringenin 10 mg	44.238	38.106	39.42	48.618	42.048	50.37	43.8	43.8	4.92434	2.20223	2.19	4.38	3.93191	14.4	13.4128	3.66234	33.5664	995.562	121.245	874.316	145.719	3.46415
ATD +Naringenin 20 mg	36.63	35.409	41.107	46.805	39.072	45.177	40.7	40.7	4.57581	2.04636	2.035	4.07	4.90087	17.5	12.7505	3.57079	40.7925	587.609	104.69	482.919	80.4865	2.99115
ATD +Naringenin 40 mg	29.997	25.839	26.73	32.967	28.512	34.155	29.7	29.7	3.3391	1.49329	1.485	2.97	-8.35925	-14.1	2.84514	1.68675	66.4336	80.4387	55.7481	24.6906	4.1151	1.5928
ATD +Silymarin 50 mg	21.62	16.92	18.988	16.356	18.048	20.868	18.8	18.8	2.11364	0.945249	0.94	1.88	12.8125	39.4	9.45644	3.07513	91.8415	1025.23	22.3374	1002.89	167.148	0.638212
	TUKEY HSD ANALYSIS
Symbols	Groups comparison		Mean Difference		Square root	Q value	Results
*	Control Vs Toxicant		-42.9		42.9	6.61355	*significant
	Control Vs per se		-0.3		0.3	6.61355	not significant
α	Control Vs Therapy 1		-28.5		28.5	6.61355	*significant
α	Control Vs Therapy 2		-25.4		25.4	6.61355	*significant
α	Control Vs Therapy 3		-14.4		14.4	6.61355	*significant
α	Control Vs Therapy 4		-3.5		3.5	6.61355	not significant
φ	Therapy 1 Vs Therapy 2		3.1		3.1	6.61355	not significant
φ	Therapy 1 Vs Therapy 3		14.1		14.1	6.61355	*significant
φ	Therapy 1 Vs Therapy 4		25		25	6.61355	*significant
λ	Therapy 2 Vs Therapy 3		11		11	6.61355	*significant
λ	Therapy 2 Vs Therapy 4		21.9		21.9	6.61355	*significant
Ω	Therapy 3 Vs Therapy 4		10.9		10.9	6.61355	*significant
Ѱ	Toxicant Vs Therapy 1		14.4		14.4	6.61355	*significant
Ѱ	Toxicant Vs Therapy 2		17.5		17.5	6.61355	*significant
Ѱ	Toxicant Vs Therapy 3		28.5		28.5	6.61355	*significant
Ѱ	Toxicant Vs Therapy 4		39.4		39.4	6.61355	*significant
Bilirubin					Average mean		G/N=	0.237143														F Critical value ANOVA 2.5336
	1	2	3	4	5	6	Cal mean	Mean	SD	SE	0.05	0.1	p value				% Protection	SS total	SS within	SS between	MS between	MS within	Anova F value	Tukey Q value
Control	0.1818	0.162	0.1566	0.1728	0.1998	0.207	0.18	0.18	0.020237	0.00905026	0.009	0.018						0.0216395	0.00204768	0.0195918	0.00326531	5.85051e-05	57.652	0.047068
Naringenin Per se	0.192	0.222	0.174	0.202	0.18	0.23	0.2	0.2	0.0224856	0.0100558	0.01	0.02	-1.47833	-0.02	0.000183027	0.0135288		0.0108056	0.002528	0.00827755	0.00137959	7.22286e-05
ATD	0.3741	0.4343	0.387	0.4773	0.4945	0.4128	0.43	0.43	0.0483439	0.0216201	0.0215	0.043	-10.6665	-0.25	0.000549334	0.0234379		0.234849	0.0116857	0.223163	0.0371939	0.000333877
ATD +Naringenin 10 mg	0.2304	0.216	0.2088	0.2424	0.276	0.2664	0.24	0.24	0.0269827	0.012067	0.012	0.024	7.67378	0.19	0.00061304	0.0247596	76	0.0036893	0.00364032	4.89796e-05	8.16327e-06	0.000104009
ATD +Naringenin 20 mg	0.253	0.198	0.2222	0.1914	0.2112	0.2442	0.22	0.22	0.0247341	0.0110614	0.011	0.022	8.64716	0.21	0.000589782	0.0242854	84	0.00482215	0.00305888	0.00176327	0.000293878	8.73966e-05
ATD +Naringenin 40 mg	0.202	0.18	0.23	0.222	0.192	0.174	0.2	0.2	0.0224856	0.0100558	0.01	0.02	0	0	0.00020224	0.0142211	92	0.0108056	0.002528	0.00827755	0.00137959	7.22286e-05
ATD +Silymarin 50 mg	0.1824	0.171	0.1919	0.2109	0.2185	0.1653	0.19	0.19	0.0213613	0.00955305	0.0095	0.019	10.1538	0.24	0.000558688	0.0236366	96	0.0156162	0.00228152	0.0133347	0.00222245	6.51863e-05
	TUKEY HSD ANALYSIS
Symbols	Groups comparison		Mean Difference		Square root	Q value	Results
*	Control Vs Toxicant		-0.25		0.25	0.047068	*significant
	Control Vs per se		-0.02		0.02	0.047068	not significant
α	Control Vs Therapy 1		-0.06		0.06	0.047068	*significant
α	Control Vs Therapy 2		-0.04		0.04	0.047068	not significant
α	Control Vs Therapy 3		-0.02		0.02	0.047068	not significant
α	Control Vs Therapy 4		-0.01		0.01	0.047068	not significant
φ	Therapy 1 Vs Therapy 2		0.02		0.02	0.047068	not significant
φ	Therapy 1 Vs Therapy 3		0.04		0.04	0.047068	not significant
φ	Therapy 1 Vs Therapy 4		0.05		0.05	0.047068	*significant
λ	Therapy 2 Vs Therapy 3		0.02		0.02	0.047068	not significant
λ	Therapy 2 Vs Therapy 4		0.03		0.03	0.047068	not significant
Ω	Therapy 3 Vs Therapy 4		0.01		0.01	0.047068	not significant
Ѱ	Toxicant Vs Therapy 1		0.19		0.19	0.047068	*significant
Ѱ	Toxicant Vs Therapy 2		0.21		0.21	0.047068	*significant
Ѱ	Toxicant Vs Therapy 3		0.23		0.23	0.047068	*significant
Ѱ	Toxicant Vs Therapy 4		0.24		0.24	0.047068	*significant
AH					Average mean		G/N=	25.0714														F Critical value ANOVA 2.5336
	1	2	3	4	5	6	Cal mean	Mean	SD	SE	0.05	0.1	p value				% Protection	SS total	SS within	SS between	MS between	MS within	Anova F value	Tukey Q value
Control	16.059	13.833	14.31	17.649	15.264	18.285	15.9	15.9	1.7876	0.79944	0.795	1.59						520.668	15.9776	504.691	84.1151	0.456503	73.3026	5.05656
Naringenin Per se	13.23	14.847	16.905	16.317	12.789	14.112	14.7	14.7	1.65269	0.739105	0.735	1.47	1.10218	1.2	1.18538	1.08875		659.056	13.6569	645.399	107.567	0.390197
ATD	43.872	39.759	46.157	52.555	50.727	41.13	45.7	45.7	5.13795	2.29776	2.285	4.57	-12.249	-29.8	5.91881	2.43286		2685.22	131.993	2553.23	425.538	3.77122
ATD +Naringenin 10 mg	30.906	26.622	27.54	35.19	33.966	29.376	30.6	30.6	3.44029	1.53854	1.53	3.06	5.46055	15.1	7.64682	2.76529	50.6711	242.569	59.178	183.391	30.5651	1.6908
ATD +Naringenin 20 mg	21.924	22.68	27.972	25.452	28.98	24.192	25.2	25.2	2.83318	1.26704	1.26	2.52	7.81267	20.5	6.88508	2.62394	68.7919	40.2337	40.1345	0.0991837	0.0165306	1.1467
ATD +Naringenin 40 mg	20.256	18.99	24.265	21.311	23.421	18.357	21.1	21.1	2.37223	1.06089	1.055	2.11	-4.94985	-6.4	1.67177	1.29297	82.5503	122.771	28.1373	94.6335	15.7722	0.803922
ATD +Silymarin 50 mg	22.523	19.401	20.07	21.408	24.753	25.645	22.3	22.3	2.50714	1.12123	1.115	2.23	9.15233	23.4	6.53685	2.55673	78.5235	77.5136	31.4287	46.0849	7.68082	0.897964
	TUKEY HSD ANALYSIS
Symbols	Groups comparison		Mean Difference		Square root	Q value	Results
*	Control Vs Toxicant		-29.8		29.8	5.05656	*significant
	Control Vs per se		1.2		1.2	5.05656	not significant
α	Control Vs Therapy 1		-14.7		14.7	5.05656	*significant
α	Control Vs Therapy 2		-9.3		9.3	5.05656	*significant
α	Control Vs Therapy 3		-5.2		5.2	5.05656	*significant
α	Control Vs Therapy 4		-6.4		6.4	5.05656	*significant
φ	Therapy 1 Vs Therapy 2		5.4		5.4	5.05656	*significant
φ	Therapy 1 Vs Therapy 3		9.5		9.5	5.05656	*significant
φ	Therapy 1 Vs Therapy 4		8.3		8.3	5.05656	*significant
λ	Therapy 2 Vs Therapy 3		4.1		4.1	5.05656	not significant
λ	Therapy 2 Vs Therapy 4		2.9		2.9	5.05656	not significant
Ω	Therapy 3 Vs Therapy 4		-1.2		1.2	5.05656	not significant
Ѱ	Toxicant Vs Therapy 1		15.1		15.1	5.05656	*significant
Ѱ	Toxicant Vs Therapy 2		20.5		20.5	5.05656	*significant
Ѱ	Toxicant Vs Therapy 3		24.6		24.6	5.05656	*significant
Ѱ	Toxicant Vs Therapy 4		23.4		23.4	5.05656	*significant
MLPO					Average mean		G/N=	1.85714														F Critical value ANOVA 2.5336
	1	2	3	4	5	6	Cal mean	Mean	SD	SE	0.05	0.1	p value				% Protection	SS total	SS within	SS between	MS between	MS within	Anova F value	Tukey Q value
Control	0.801	0.8989	1.0235	0.9879	0.7743	0.8544	0.89	0.89	0.100061	0.0447485	0.0445	0.089						5.66225	0.0500607	5.61219	0.935365	0.00143031	123.435	0.395775
Naringenin Per se	0.8004	0.9292	0.828	1.0212	1.058	0.8832	0.92	0.92	0.103434	0.0462569	0.046	0.092	-0.466133	-0.03	0.00414213	0.0643594		5.32291	0.0534925	5.26942	0.878237	0.00152836
ATD	3.582	3.4626	4.0198	4.4178	4.577	3.8208	3.98	3.98	0.447462	0.200111	0.199	0.398	-15.0692	-3.09	0.042047	0.205054		28.0402	1.00111	27.0391	4.50652	0.0286032
ATD +Naringenin 10 mg	2.691	2.106	2.0358	2.3634	2.5974	2.2464	2.34	2.34	0.263081	0.117653	0.117	0.234	7.06484	1.64	0.0538868	0.232135	53.0744	1.74496	0.346058	1.39891	0.233151	0.00988737
ATD +Naringenin 20 mg	1.653	1.919	2.109	2.185	1.824	1.71	1.9	1.9	0.213613	0.0955305	0.095	0.19	9.38017	2.08	0.0491706	0.221744	67.3139	0.239172	0.228152	0.0110204	0.00183673	0.00651863
ATD +Naringenin 40 mg	1.2827	1.1049	1.4097	1.4605	1.2192	1.143	1.27	1.27	0.142783	0.0638546	0.0635	0.127	-4.43888	-0.35	0.00621711	0.0788487	87.7023	2.17036	0.101935	2.06842	0.344737	0.00291244
ATD +Silymarin 50 mg	1.955	1.632	1.479	1.717	1.887	1.53	1.7	1.7	0.191127	0.0854747	0.085	0.17	10.4779	2.28	0.0473505	0.217602	73.7864	0.330811	0.182648	0.148163	0.0246939	0.00521851
	TUKEY HSD ANALYSIS
Symbols	Groups comparison		Mean Difference		Square root	Q value	Results
*	Control Vs Toxicant		-3.09		3.09	0.395775	*significant
	Control Vs per se		-0.03		0.03	0.395775	not significant
α	Control Vs Therapy 1		-1.45		1.45	0.395775	*significant
α	Control Vs Therapy 2		-1.01		1.01	0.395775	*significant
α	Control Vs Therapy 3		-0.38		0.38	0.395775	not significant
α	Control Vs Therapy 4		-0.81		0.81	0.395775	*significant
φ	Therapy 1 Vs Therapy 2		0.44		0.44	0.395775	*significant
φ	Therapy 1 Vs Therapy 3		1.07		1.07	0.395775	*significant
φ	Therapy 1 Vs Therapy 4		0.64		0.64	0.395775	*significant
λ	Therapy 2 Vs Therapy 3		0.63		0.63	0.395775	*significant
λ	Therapy 2 Vs Therapy 4		0.2		0.2	0.395775	not significant
Ω	Therapy 3 Vs Therapy 4		-0.43		0.43	0.395775	*significant
Ѱ	Toxicant Vs Therapy 1		1.64		1.64	0.395775	*significant
Ѱ	Toxicant Vs Therapy 2		2.08		2.08	0.395775	*significant
Ѱ	Toxicant Vs Therapy 3		2.71		2.71	0.395775	*significant
Ѱ	Toxicant Vs Therapy 4		2.28		2.28	0.395775	*significant
Microsomal protein					Average mean		G/N=	6.67571														F Critical value ANOVA 2.5336
	1	2	3	4	5	6	Cal mean	Mean	SD	SE	0.05	0.1	p value				% Protection	SS total	SS within	SS between	MS between	MS within	Anova F value	Tukey Q value
Control	7.6128	7.137	6.8991	8.0093	8.8023	9.1195	7.93	7.93	0.891552	0.398714	0.3965	0.793						13.4137	3.97433	9.4394	1.57323	0.113552	18.712	1.27587
Naringenin Per se	7.101	7.9689	8.7579	9.0735	7.5744	6.8643	7.89	7.89	0.887055	0.396703	0.3945	0.789	0.0711178	0.04	0.316346	0.562447		12.7813	3.93433	8.84694	1.47449	0.11241
ATD	3.87	4.343	4.945	4.773	3.741	4.128	4.3	4.3	0.483439	0.216201	0.215	0.43	8.00337	3.63	0.205716	0.453559		35.0327	1.16857	33.8641	5.64402	0.0333877
ATD +Naringenin 10 mg	4.914	6.279	4.7502	6.0606	5.5146	5.2416	5.46	5.46	0.613856	0.274525	0.273	0.546	-3.31962	-1.16	0.122106	0.349437	31.9559	10.7519	1.88409	8.86777	1.47796	0.0538312
ATD +Naringenin 20 mg	5.949	6.6761	7.6015	7.3371	5.7507	6.3456	6.61	6.61	0.743147	0.332346	0.3305	0.661	-5.82627	-2.31	0.157196	0.39648	63.6364	2.78725	2.76134	0.0259102	0.00431837	0.0788954
ATD +Naringenin 40 mg	7.0944	8.2029	8.4985	6.4293	6.651	7.4639	7.39	7.39	0.830841	0.371563	0.3695	0.739	0.9199	0.5	0.295433	0.543537	85.124	6.51271	3.45148	3.06122	0.510204	0.0986138
ATD +Silymarin 50 mg	6.435	7.2215	8.2225	7.9365	6.2205	6.864	7.15	7.15	0.803858	0.359496	0.3575	0.715	-6.7938	-2.85	0.17598	0.4195	78.5124	4.58062	3.23094	1.34968	0.224947	0.0923126
	TUKEY HSD ANALYSIS
Symbols	Groups comparison		Mean Difference		Square root	Q value	Results
*	Control Vs Toxicant		3.63		3.63	1.27587	*significant
	Control Vs per se		0.04		0.04	1.27587	not significant
α	Control Vs Therapy 1		2.47		2.47	1.27587	*significant
α	Control Vs Therapy 2		1.32		1.32	1.27587	*significant
α	Control Vs Therapy 3		0.54		0.54	1.27587	not significant
α	Control Vs Therapy 4		0.78		0.78	1.27587	not significant
φ	Therapy 1 Vs Therapy 2		-1.15		1.15	1.27587	not significant
φ	Therapy 1 Vs Therapy 3		-1.93		1.93	1.27587	*significant
φ	Therapy 1 Vs Therapy 4		-1.69		1.69	1.27587	*significant
λ	Therapy 2 Vs Therapy 3		-0.78		0.78	1.27587	not significant
λ	Therapy 2 Vs Therapy 4		-0.54		0.54	1.27587	not significant
Ω	Therapy 3 Vs Therapy 4		0.24		0.24	1.27587	not significant
Ѱ	Toxicant Vs Therapy 1		-1.16		1.16	1.27587	not significant
Ѱ	Toxicant Vs Therapy 2		-2.31		2.31	1.27587	*significant
Ѱ	Toxicant Vs Therapy 3		-3.09		3.09	1.27587	*significant
Ѱ	Toxicant Vs Therapy 4		-2.85		2.85	1.27587	*significant
Liver CHO					Average mean		G/N=	0.372857														F Critical value ANOVA 2.5336
	1	2	3	4	5	6	Cal mean	Mean	SD	SE	0.05	0.1	p value				% Protection	SS total	SS within	SS between	MS between	MS within	Anova F value	Tukey Q value
Control	0.279	0.2697	0.3441	0.3131	0.2976	0.3565	0.31	0.31	0.0348526	0.0155866	0.0155	0.031						0.0297796	0.00607352	0.0237061	0.00395102	0.000173529	30.8164	0.0720809
Naringenin Per se	0.4025	0.3535	0.3045	0.315	0.3885	0.336	0.35	0.35	0.0393497	0.0175977	0.0175	0.035	-1.70156	-0.04	0.000552621	0.0235079		0.0108767	0.007742	0.00313469	0.000522449	0.0002212
ATD	0.6549	0.531	0.5664	0.5133	0.6785	0.5959	0.59	0.59	0.0663324	0.0296647	0.0295	0.059	-8.35565	-0.28	0.00112294	0.0335103		0.304906	0.0219999	0.282906	0.047151	0.000628569
ATD +Naringenin 10 mg	0.4107	0.4255	0.3552	0.333	0.3219	0.3737	0.37	0.37	0.0415983	0.0186033	0.0185	0.037	6.28295	0.22	0.00122608	0.0350154	78.5714	0.00870106	0.00865208	4.89796e-05	8.16327e-06	0.000247202
ATD +Naringenin 20 mg	0.306	0.3434	0.3264	0.391	0.2958	0.3774	0.34	0.34	0.0382254	0.0170949	0.017	0.034	7.30185	0.25	0.00117223	0.0342379	89.2857	0.0137835	0.00730592	0.00647755	0.00107959	0.000208741
ATD +Naringenin 40 mg	0.3663	0.297	0.3168	0.3333	0.2871	0.3795	0.33	0.33	0.0371012	0.0165921	0.0165	0.033	0.826913	0.02	0.000584979	0.0241863	92.8571	0.0179029	0.00688248	0.0110204	0.00183673	0.000196642
ATD +Silymarin 50 mg	0.3552	0.3072	0.2784	0.288	0.3232	0.368	0.32	0.32	0.0359769	0.0160894	0.016	0.032	8.0007	0.27	0.00113886	0.0337471	96.4286	0.0232349	0.00647168	0.0167633	0.00279388	0.000184905
	TUKEY HSD ANALYSIS
Symbols	Groups comparison		Mean Difference		Square root	Q value	Results
*	Control Vs Toxicant		-0.28		0.28	0.0720809	*significant
	Control Vs per se		-0.04		0.04	0.0720809	not significant
α	Control Vs Therapy 1		-0.06		0.06	0.0720809	not significant
α	Control Vs Therapy 2		-0.03		0.03	0.0720809	not significant
α	Control Vs Therapy 3		-0.02		0.02	0.0720809	not significant
α	Control Vs Therapy 4		-0.01		0.01	0.0720809	not significant
φ	Therapy 1 Vs Therapy 2		0.03		0.03	0.0720809	not significant
φ	Therapy 1 Vs Therapy 3		0.04		0.04	0.0720809	not significant
φ	Therapy 1 Vs Therapy 4		0.05		0.05	0.0720809	not significant
λ	Therapy 2 Vs Therapy 3		0.01		0.01	0.0720809	not significant
λ	Therapy 2 Vs Therapy 4		0.02		0.02	0.0720809	not significant
Ω	Therapy 3 Vs Therapy 4		0.01		0.01	0.0720809	not significant
Ѱ	Toxicant Vs Therapy 1		0.22		0.22	0.0720809	*significant
Ѱ	Toxicant Vs Therapy 2		0.25		0.25	0.0720809	*significant
Ѱ	Toxicant Vs Therapy 3		0.26		0.26	0.0720809	*significant
Ѱ	Toxicant Vs Therapy 4		0.27		0.27	0.0720809	*significant
Kidney CHO					Average mean		G/N=	0.441429														F Critical value ANOVA 2.5336
	1	2	3	4	5	6	Cal mean	Mean	SD	SE	0.05	0.1	p value				% Protection	SS total	SS within	SS between	MS between	MS within	Anova F value	Tukey Q value
Control	0.2626	0.2262	0.2886	0.234	0.2496	0.299	0.26	0.26	0.0292312	0.0130726	0.013	0.026						0.20177	0.00427232	0.197498	0.0329163	0.000122066	64.7785	0.0882507
Naringenin Per se	0.2525	0.225	0.24	0.2775	0.2175	0.2875	0.25	0.25	0.0281069	0.0125698	0.0125	0.025	0.551408	0.01	0.000328893	0.0181354		0.223819	0.00395	0.219869	0.0366449	0.000112857
ATD	0.6432	0.7705	0.7437	0.5829	0.603	0.6767	0.67	0.67	0.0753266	0.0336871	0.0335	0.067	-11.3465	-0.41	0.00130571	0.0361346		0.34184	0.0283705	0.313469	0.0522449	0.000810585
ATD +Naringenin 10 mg	0.6882	0.5394	0.558	0.5952	0.713	0.6262	0.62	0.62	0.0697052	0.0311731	0.031	0.062	1.08938	0.05	0.00210658	0.0458975	12.1951	0.215621	0.0242941	0.191327	0.0318878	0.000694117
ATD +Naringenin 20 mg	0.6325	0.495	0.5555	0.528	0.4785	0.6105	0.55	0.55	0.0618353	0.0276536	0.0275	0.055	2.75332	0.12	0.00189954	0.0435837	29.2683	0.0898445	0.019118	0.0707265	0.0117878	0.000546229
ATD +Naringenin 40 mg	0.4032	0.483	0.4662	0.4242	0.3654	0.378	0.42	0.42	0.0472197	0.0211173	0.021	0.042	-6.91755	-0.17	0.000603939	0.0245752	60.9756	0.0139036	0.0111485	0.0027551	0.000459184	0.000318528
ATD +Silymarin 50 mg	0.3552	0.3232	0.368	0.2784	0.3072	0.288	0.32	0.32	0.0359769	0.0160894	0.016	0.032	9.37531	0.35	0.00139369	0.0373321	85.3659	0.0949411	0.00647168	0.0884694	0.0147449	0.000184905
	TUKEY HSD ANALYSIS
Symbols	Groups comparison		Mean Difference		Square root	Q value	Results
*	Control Vs Toxicant		-0.41		0.41	0.0882507	*significant
	Control Vs per se		0.01		0.01	0.0882507	not significant
α	Control Vs Therapy 1		-0.36		0.36	0.0882507	*significant
α	Control Vs Therapy 2		-0.29		0.29	0.0882507	*significant
α	Control Vs Therapy 3		-0.16		0.16	0.0882507	*significant
α	Control Vs Therapy 4		-0.06		0.06	0.0882507	not significant
φ	Therapy 1 Vs Therapy 2		0.07		0.07	0.0882507	not significant
φ	Therapy 1 Vs Therapy 3		0.2		0.2	0.0882507	*significant
φ	Therapy 1 Vs Therapy 4		0.3		0.3	0.0882507	*significant
λ	Therapy 2 Vs Therapy 3		0.13		0.13	0.0882507	*significant
λ	Therapy 2 Vs Therapy 4		0.23		0.23	0.0882507	*significant
Ω	Therapy 3 Vs Therapy 4		0.1		0.1	0.0882507	*significant
Ѱ	Toxicant Vs Therapy 1		0.05		0.05	0.0882507	not significant
Ѱ	Toxicant Vs Therapy 2		0.12		0.12	0.0882507	*significant
Ѱ	Toxicant Vs Therapy 3		0.25		0.25	0.0882507	*significant
Ѱ	Toxicant Vs Therapy 4		0.35		0.35	0.0882507	*significant
Liver TG					Average mean		G/N=	18.0757														F Critical value ANOVA 2.5336
	1	2	3	4	5	6	Cal mean	Mean	SD	SE	0.05	0.1	p value				% Protection	SS total	SS within	SS between	MS between	MS within	Anova F value	Tukey Q value
Control	11.808	14.145	12.423	13.653	10.701	11.07	12.3	12.3	1.38286	0.618434	0.615	1.23						209.715	9.56153	200.153	33.3589	0.273187	67.4532	3.62363
Naringenin Per se	14.49	10.962	13.986	11.34	12.096	12.726	12.6	12.6	1.41659	0.633518	0.63	1.26	-0.338857	-0.3	0.783806	0.885328		189.934	10.0336	179.901	29.9834	0.286675
ATD	33.3603	29.727	31.7088	28.7361	36.6633	37.9845	33.03	33.03	3.71349	1.66072	1.6515	3.303	-11.6978	-20.73	3.14046	1.77213		1410.73	68.95	1341.78	223.631	1.97
ATD +Naringenin 10 mg	22.533	17.661	20.503	18.27	19.488	23.345	20.3	20.3	2.28228	1.02067	1.015	2.03	6.53056	12.73	3.79976	1.9493	61.4086	55.7288	26.0441	29.6847	4.94745	0.744117
ATD +Naringenin 20 mg	16.02	19.758	17.088	17.978	15.486	20.47	17.8	17.8	2.00121	0.89497	0.89	1.78	8.07305	15.23	3.55897	1.88652	73.4684	20.4804	20.0243	0.45611	0.0760184	0.572123
ATD +Naringenin 40 mg	11.79	14.541	12.576	11.397	15.065	13.231	13.1	13.1	1.4728	0.658658	0.655	1.31	-0.547118	-0.5	0.835175	0.913879	96.1409	159.392	10.8458	148.546	24.7577	0.309879
ATD +Silymarin 50 mg	19.314	16.704	20.01	15.66	17.574	15.138	17.4	17.4	1.95624	0.874858	0.87	1.74	8.32682	15.63	3.52338	1.87707	75.398	21.874	19.1344	2.73954	0.45659	0.546698
	TUKEY HSD ANALYSIS
Symbols	Groups comparison		Mean Difference		Square root	Q value	Results
*	Control Vs Toxicant		-20.73		20.73	3.62363	*significant
	Control Vs per se		-0.3		0.3	3.62363	not significant
α	Control Vs Therapy 1		-8		8	3.62363	*significant
α	Control Vs Therapy 2		-5.5		5.5	3.62363	*significant
α	Control Vs Therapy 3		-0.8		0.8	3.62363	not significant
α	Control Vs Therapy 4		-5.1		5.1	3.62363	*significant
φ	Therapy 1 Vs Therapy 2		2.5		2.5	3.62363	not significant
φ	Therapy 1 Vs Therapy 3		7.2		7.2	3.62363	*significant
φ	Therapy 1 Vs Therapy 4		2.9		2.9	3.62363	not significant
λ	Therapy 2 Vs Therapy 3		4.7		4.7	3.62363	*significant
λ	Therapy 2 Vs Therapy 4		0.4		0.4	3.62363	not significant
Ω	Therapy 3 Vs Therapy 4		-4.3		4.3	3.62363	*significant
Ѱ	Toxicant Vs Therapy 1		12.73		12.73	3.62363	*significant
Ѱ	Toxicant Vs Therapy 2		15.23		15.23	3.62363	*significant
Ѱ	Toxicant Vs Therapy 3		19.93		19.93	3.62363	*significant
Ѱ	Toxicant Vs Therapy 4		15.63		15.63	3.62363	*significant
Kidney TG					Average mean		G/N=	15.86														F Critical value ANOVA 2.5336
	1	2	3	4	5	6	Cal mean	Mean	SD	SE	0.05	0.1	p value				% Protection	SS total	SS within	SS between	MS between	MS within	Anova F value	Tukey Q value
Control	13.225	10.005	10.35	11.615	11.04	12.765	11.5	11.5	1.29292	0.578211	0.575	1.15						122.416	8.3582	114.058	19.0096	0.238806	55.1278	3.13991
Naringenin Per se	11.712	14.03	10.98	12.322	13.542	10.614	12.2	12.2	1.37162	0.613406	0.61	1.22	-0.830399	-0.7	0.710596	0.842968		89.7803	9.40669	80.3736	13.3956	0.268763
ATD	24.2208	28.1184	25.056	30.9024	32.016	26.7264	27.84	27.84	3.12999	1.39977	1.392	2.784	-10.7891	-16.34	2.29369	1.51449		910.107	48.9841	861.122	143.52	1.39955
ATD +Naringenin 10 mg	15.858	19.5582	16.9152	20.263	17.7962	15.3294	17.62	17.62	1.98098	0.88592	0.881	1.762	6.16938	10.22	2.74422	1.65657	62.5459	38.207	19.6214	18.5856	3.0976	0.56061
ATD +Naringenin 20 mg	16.4058	14.9278	12.8586	13.302	16.997	14.1888	14.78	14.78	1.66168	0.743127	0.739	1.478	8.24077	13.06	2.5116	1.5848	79.9266	20.8043	13.8059	6.9984	1.1664	0.394455
ATD +Naringenin 40 mg	11.6928	14.007	12.3018	13.5198	10.5966	10.962	12.18	12.18	1.36937	0.612401	0.609	1.218	0.023074	0.02	0.751302	0.866777	95.8384	90.6303	9.37587	81.2544	13.5424	0.267882
ATD +Silymarin 50 mg	12.963	14.304	17.135	16.539	13.41	15.049	14.9	14.9	1.67517	0.74916	0.745	1.49	8.15045	12.94	2.52061	1.58764	79.1922	19.5606	14.031	5.5296	0.9216	0.400887
	TUKEY HSD ANALYSIS
Symbols	Groups comparison		Mean Difference		Square root	Q value	Results
*	Control Vs Toxicant		-16.34		16.34	3.13991	*significant
	Control Vs per se		-0.7		0.7	3.13991	not significant
α	Control Vs Therapy 1		-6.12		6.12	3.13991	*significant
α	Control Vs Therapy 2		-3.28		3.28	3.13991	*significant
α	Control Vs Therapy 3		-0.68		0.68	3.13991	not significant
α	Control Vs Therapy 4		-3.4		3.4	3.13991	*significant
φ	Therapy 1 Vs Therapy 2		2.84		2.84	3.13991	not significant
φ	Therapy 1 Vs Therapy 3		5.44		5.44	3.13991	*significant
φ	Therapy 1 Vs Therapy 4		2.72		2.72	3.13991	not significant
λ	Therapy 2 Vs Therapy 3		2.6		2.6	3.13991	not significant
λ	Therapy 2 Vs Therapy 4		-0.12		0.12	3.13991	not significant
Ω	Therapy 3 Vs Therapy 4		-2.72		2.72	3.13991	not significant
Ѱ	Toxicant Vs Therapy 1		10.22		10.22	3.13991	*significant
Ѱ	Toxicant Vs Therapy 2		13.06		13.06	3.13991	*significant
Ѱ	Toxicant Vs Therapy 3		15.66		15.66	3.13991	*significant
Ѱ	Toxicant Vs Therapy 4		12.94		12.94	3.13991	*significant
Liver Protein					Average mean		G/N=	13.2771														F Critical value ANOVA 2.5336
	1	2	3	4	5	6	Cal mean	Mean	SD	SE	0.05	0.1	p value				% Protection	SS total	SS within	SS between	MS between	MS within	Anova F value	Tukey Q value
Control	13.14	16.206	12.702	14.746	16.79	14.016	14.6	14.6	1.64145	0.734077	0.73	1.46						23.9714	13.4717	10.4997	1.74995	0.384906	6.94653	2.5101
Naringenin Per se	14.112	16.905	16.317	14.847	12.789	13.23	14.7	14.7	1.65269	0.739105	0.735	1.47	-0.0959967	-0.1	1.08514	1.0417		25.804	13.6569	12.1471	2.02452	0.390197
ATD	11.6725	11.2665	9.744	8.8305	10.2515	9.135	10.15	10.15	1.14114	0.510334	0.5075	1.015	4.9774	4.45	0.799309	0.894041		65.1852	6.51102	58.6741	9.77902	0.186029
ATD +Naringenin 10 mg	11.025	10.6575	11.76	12.3725	14.0875	13.5975	12.25	12.25	1.37724	0.61592	0.6125	1.225	-2.62541	-2.1	0.639799	0.799874	47.191	15.8141	9.48395	6.33013	1.05502	0.27097
ATD +Naringenin 20 mg	14.6964	12.7104	11.5188	11.916	15.226	13.3724	13.24	13.24	1.48854	0.665697	0.662	1.324	-3.68381	-3.09	0.703593	0.838805	69.4382	11.0871	11.0788	0.00827755	0.00137959	0.316537
ATD +Naringenin 40 mg	12.69	15.651	13.536	16.215	14.241	12.267	14.1	14.1	1.58523	0.708937	0.705	1.41	0.585856	0.6	1.04887	1.02414	88.764	16.6274	12.5648	4.06256	0.677094	0.358994
ATD +Silymarin 50 mg	12.093	15.985	15.429	12.51	13.344	14.039	13.9	13.9	1.56275	0.698881	0.695	1.39	-4.33338	-3.75	0.748876	0.865376	84.2697	14.5386	12.2109	2.32771	0.387951	0.348882
	TUKEY HSD ANALYSIS
Symbols	Groups comparison		Mean Difference		Square root	Q value	Results
*	Control Vs Toxicant		4.45		4.45	2.5101	*significant
	Control Vs per se		-0.1		0.1	2.5101	not significant
α	Control Vs Therapy 1		2.35		2.35	2.5101	not significant
α	Control Vs Therapy 2		1.36		1.36	2.5101	not significant
α	Control Vs Therapy 3		0.5		0.5	2.5101	not significant
α	Control Vs Therapy 4		0.7		0.7	2.5101	not significant
φ	Therapy 1 Vs Therapy 2		-0.99		0.99	2.5101	not significant
φ	Therapy 1 Vs Therapy 3		-1.85		1.85	2.5101	not significant
φ	Therapy 1 Vs Therapy 4		-1.65		1.65	2.5101	not significant
λ	Therapy 2 Vs Therapy 3		-0.86		0.86	2.5101	not significant
λ	Therapy 2 Vs Therapy 4		-0.66		0.66	2.5101	not significant
Ω	Therapy 3 Vs Therapy 4		0.2		0.2	2.5101	not significant
Ѱ	Toxicant Vs Therapy 1		-2.1		2.1	2.5101	not significant
Ѱ	Toxicant Vs Therapy 2		-3.09		3.09	2.5101	*significant
Ѱ	Toxicant Vs Therapy 3		-3.95		3.95	2.5101	*significant
Ѱ	Toxicant Vs Therapy 4		-3.75		3.75	2.5101	*significant
Kidney protein					Average mean		G/N=	11.3743														F Critical value ANOVA 2.5336
	1	2	3	4	5	6	Cal mean	Mean	SD	SE	0.05	0.1	p value				% Protection	SS total	SS within	SS between	MS between	MS within	Anova F value	Tukey Q value
Control	12.726	11.34	14.49	12.096	13.986	10.962	12.6	12.6	1.41659	0.633518	0.63	1.26						19.0479	10.0336	9.01425	1.50238	0.286675	7.98437	2.1524
Naringenin Per se	14.26	13.764	11.16	11.904	12.524	10.788	12.4	12.4	1.3941	0.623462	0.62	1.24	0.22501	0.2	0.790051	0.888848		16.0302	9.71763	6.31254	1.05209	0.277647
ATD	7.8912	7.1514	9.1242	8.3022	9.453	7.398	8.22	8.22	0.924156	0.413295	0.411	0.822	5.7905	4.38	0.572158	0.756411		63.9674	4.27032	59.6971	9.94952	0.122009
ATD +Naringenin 10 mg	9.99	12.321	10.656	11.211	9.657	12.765	11.1	11.1	1.24795	0.558099	0.555	1.11	-4.14705	-2.88	0.482288	0.694469	65.7534	8.23827	7.78687	0.451396	0.0752327	0.222482
ATD +Naringenin 20 mg	10.26	11.514	12.654	9.918	13.11	10.944	11.4	11.4	1.28168	0.573183	0.57	1.14	-4.50012	-3.18	0.499352	0.706648	72.6027	8.21744	8.21347	0.00396735	0.000661224	0.234671
ATD +Naringenin 40 mg	12.019	11.424	13.685	10.353	10.71	13.209	11.9	11.9	1.33789	0.598323	0.595	1.19	0.578626	0.5	0.746695	0.864115	84.0183	10.608	8.94975	1.65825	0.276376	0.255707
ATD +Silymarin 50 mg	13.8	13.32	11.52	12.12	10.44	10.8	12	12	1.34913	0.603351	0.6	1.2	-5.16866	-3.78	0.534845	0.731331	86.3014	11.4499	9.1008	2.34911	0.391518	0.260023
	TUKEY HSD ANALYSIS
Symbols	Groups comparison		Mean Difference		Square root	Q value	Results
*	Control Vs Toxicant		4.38		4.38	2.1524	*significant
	Control Vs per se		0.2		0.2	2.1524	not significant
α	Control Vs Therapy 1		1.5		1.5	2.1524	not significant
α	Control Vs Therapy 2		1.2		1.2	2.1524	not significant
α	Control Vs Therapy 3		0.7		0.7	2.1524	not significant
α	Control Vs Therapy 4		0.6		0.6	2.1524	not significant
φ	Therapy 1 Vs Therapy 2		-0.3		0.3	2.1524	not significant
φ	Therapy 1 Vs Therapy 3		-0.8		0.8	2.1524	not significant
φ	Therapy 1 Vs Therapy 4		-0.9		0.9	2.1524	not significant
λ	Therapy 2 Vs Therapy 3		-0.5		0.5	2.1524	not significant
λ	Therapy 2 Vs Therapy 4		-0.6		0.6	2.1524	not significant
Ω	Therapy 3 Vs Therapy 4		-0.1		0.1	2.1524	not significant
Ѱ	Toxicant Vs Therapy 1		-2.88		2.88	2.1524	*significant
Ѱ	Toxicant Vs Therapy 2		-3.18		3.18	2.1524	*significant
Ѱ	Toxicant Vs Therapy 3		-3.68		3.68	2.1524	*significant
Ѱ	Toxicant Vs Therapy 4		-3.78		3.78	2.1524	*significant
Liver GR					Average mean		G/N=	5.50857														F Critical value ANOVA 2.5336
	1	2	3	4	5	6	Cal mean	Mean	SD	SE	0.05	0.1	p value				% Protection	SS total	SS within	SS between	MS between	MS within	Anova F value	Tukey Q value
Control	6.6761	5.7507	6.3456	7.6015	7.3371	5.949	6.61	6.61	0.743147	0.332346	0.3305	0.661						10.0402	2.76134	7.27887	1.21314	0.0788954	23.9475	1.05799
Naringenin Per se	7.2261	7.4865	6.2496	5.859	5.6637	6.5751	6.51	6.51	0.731905	0.327318	0.3255	0.651	0.214378	0.1	0.217591	0.466466		8.69558	2.67842	6.01716	1.00286	0.0765264
ATD	3.4521	3.5765	2.9856	2.799	2.7057	3.1411	3.11	3.11	0.34965	0.156368	0.1555	0.311	9.52916	3.5	0.134905	0.367294		35.1301	0.611277	34.5189	5.75314	0.017465
ATD +Naringenin 10 mg	4.05	3.915	4.545	5.175	4.32	4.995	4.5	4.5	0.505925	0.226256	0.225	0.45	-5.05394	-1.39	0.0756431	0.275033	39.7143	7.3831	1.2798	6.1033	1.01722	0.0365657
ATD +Naringenin 20 mg	6.5046	6.739	5.6256	5.274	5.0982	5.9186	5.86	5.86	0.658827	0.294636	0.293	0.586	-8.24442	-2.75	0.111262	0.333559	78.5714	2.91127	2.17026	0.741012	0.123502	0.0620075
ATD +Naringenin 40 mg	5.508	6.7932	5.8752	6.1812	5.3244	7.038	6.12	6.12	0.688058	0.307709	0.306	0.612	0.868122	0.39	0.201822	0.449246	86	4.61019	2.36712	2.24307	0.373845	0.0676319
ATD +Silymarin 50 mg	5.265	6.4935	5.616	6.7275	5.9085	5.0895	5.85	5.85	0.657702	0.294133	0.2925	0.585	-8.22539	-2.74	0.110966	0.333115	78.2857	2.8623	2.16286	0.699441	0.116573	0.0617961
	TUKEY HSD ANALYSIS
Symbols	Groups comparison		Mean Difference		Square root	Q value	Results
*	Control Vs Toxicant		3.5		3.5	1.05799	*significant
	Control Vs per se		0.1		0.1	1.05799	not significant
α	Control Vs Therapy 1		2.11		2.11	1.05799	*significant
α	Control Vs Therapy 2		0.75		0.75	1.05799	not significant
α	Control Vs Therapy 3		0.49		0.49	1.05799	not significant
α	Control Vs Therapy 4		0.76		0.76	1.05799	not significant
φ	Therapy 1 Vs Therapy 2		-1.36		1.36	1.05799	*significant
φ	Therapy 1 Vs Therapy 3		-1.62		1.62	1.05799	*significant
φ	Therapy 1 Vs Therapy 4		-1.35		1.35	1.05799	*significant
λ	Therapy 2 Vs Therapy 3		-0.26		0.26	1.05799	not significant
λ	Therapy 2 Vs Therapy 4		0.01		0.01	1.05799	not significant
Ω	Therapy 3 Vs Therapy 4		0.27		0.27	1.05799	not significant
Ѱ	Toxicant Vs Therapy 1		-1.39		1.39	1.05799	*significant
Ѱ	Toxicant Vs Therapy 2		-2.75		2.75	1.05799	*significant
Ѱ	Toxicant Vs Therapy 3		-3.01		3.01	1.05799	*significant
Ѱ	Toxicant Vs Therapy 4		-2.74		2.74	1.05799	*significant
Kidney GR					Average mean		G/N=	3.92143														F Critical value ANOVA 2.5336
	1	2	3	4	5	6	Cal mean	Mean	SD	SE	0.05	0.1	p value				% Protection	SS total	SS within	SS between	MS between	MS within	Anova F value	Tukey Q value
Control	4.8285	5.0025	4.176	3.915	3.7845	4.3935	4.35	4.35	0.489061	0.218715	0.2175	0.435						2.29794	1.1959	1.10204	0.183673	0.0341686	6.5867	0.741118
Naringenin Per se	4.8729	5.0485	4.2144	3.951	3.8193	4.4339	4.39	4.39	0.493558	0.220726	0.2195	0.439	-0.128727	-0.04	0.0965559	0.310735		2.53535	1.218	1.31736	0.219559	0.0347999
ATD	3.4077	3.5305	2.9472	2.763	2.6709	3.1007	3.07	3.07	0.345153	0.154357	0.1535	0.307	4.78151	1.28	0.0716622	0.267698		4.94524	0.595654	4.34958	0.724931	0.0170187
ATD +Naringenin 10 mg	4.0515	4.1975	3.504	3.285	3.1755	3.6865	3.65	3.65	0.410361	0.183519	0.1825	0.365	-2.41865	-0.58	0.0575054	0.239803	45.3125	1.28402	0.841982	0.442041	0.0736735	0.0240566
ATD +Naringenin 20 mg	3.6384	3.2973	4.3585	3.8279	3.411	4.2069	3.79	3.79	0.426101	0.190558	0.1895	0.379	-2.936	-0.72	0.0601386	0.245232	56.25	1.01145	0.907811	0.103641	0.0172735	0.0259375
ATD +Naringenin 40 mg	4.0602	3.4974	4.4622	3.8592	3.618	4.623	4.02	4.02	0.45196	0.202122	0.201	0.402	1.23627	0.37	0.0895734	0.299288	74.2187	1.07964	1.02134	0.058298	0.00971633	0.0291811
ATD +Silymarin 50 mg	3.762	4.2218	3.6366	4.0128	4.807	4.6398	4.18	4.18	0.469948	0.210167	0.209	0.418	-4.25677	-1.11	0.0679964	0.260761	86.7188	1.50541	1.10426	0.401155	0.0668592	0.0315502
	TUKEY HSD ANALYSIS
Symbols	Groups comparison		Mean Difference		Square root	Q value	Results
*	Control Vs Toxicant		1.28		1.28	0.741118	*significant
	Control Vs per se		-0.04		0.04	0.741118	not significant
α	Control Vs Therapy 1		0.7		0.7	0.741118	not significant
α	Control Vs Therapy 2		0.56		0.56	0.741118	not significant
α	Control Vs Therapy 3		0.33		0.33	0.741118	not significant
α	Control Vs Therapy 4		0.17		0.17	0.741118	not significant
φ	Therapy 1 Vs Therapy 2		-0.14		0.14	0.741118	not significant
φ	Therapy 1 Vs Therapy 3		-0.37		0.37	0.741118	not significant
φ	Therapy 1 Vs Therapy 4		-0.53		0.53	0.741118	not significant
λ	Therapy 2 Vs Therapy 3		-0.23		0.23	0.741118	not significant
λ	Therapy 2 Vs Therapy 4		-0.39		0.39	0.741118	not significant
Ω	Therapy 3 Vs Therapy 4		-0.16		0.16	0.741118	not significant
Ѱ	Toxicant Vs Therapy 1		-0.58		0.58	0.741118	not significant
Ѱ	Toxicant Vs Therapy 2		-0.72		0.72	0.741118	not significant
Ѱ	Toxicant Vs Therapy 3		-0.95		0.95	0.741118	*significant
Ѱ	Toxicant Vs Therapy 4		-1.11		1.11	0.741118	*significant
Liver GPx					Average mean		G/N=	3.21														F Critical value ANOVA 2.5336
	1	2	3	4	5	6	Cal mean	Mean	SD	SE	0.05	0.1	p value				% Protection	SS total	SS within	SS between	MS between	MS within	Anova F value	Tukey Q value
Control	3.6663	4.0293	3.1581	3.4848	4.1745	3.267	3.63	3.63	0.408113	0.182514	0.1815	0.363						1.89118	0.83278	1.0584	0.1764	0.0237937	18.3523	0.613293
Naringenin Per se	3.4656	4.0071	4.1515	3.6461	3.249	3.1407	3.61	3.61	0.405864	0.181508	0.1805	0.361	0.0776991	0.02	0.0662564	0.257403		1.78363	0.823629	0.96	0.16	0.0235322
ATD	2.0313	2.1045	1.7568	1.647	1.5921	1.8483	1.83	1.83	0.205743	0.092011	0.0915	0.183	8.80649	1.8	0.0417772	0.204395		11.6381	0.21165	11.4264	1.9044	0.00604716
ATD +Naringenin 10 mg	2.718	2.6274	3.3522	3.473	3.0502	2.8992	3.02	3.02	0.339532	0.151843	0.151	0.302	-6.70251	-1.19	0.0315224	0.177545	66.1111	0.793009	0.576409	0.2166	0.0361	0.0164688
ATD +Naringenin 20 mg	2.9493	3.051	3.4239	3.2544	3.8985	3.7629	3.39	3.39	0.38113	0.170447	0.1695	0.339	-8.05387	-1.56	0.037518	0.193696	86.6667	0.920701	0.726301	0.1944	0.0324	0.0207514
ATD +Naringenin 40 mg	4.0365	3.5451	3.0537	3.8961	3.159	3.3696	3.51	3.51	0.394621	0.17648	0.1755	0.351	0.395006	0.1	0.0640904	0.253161	93.3333	1.31863	0.77863	0.54	0.09	0.0222466
ATD +Silymarin 50 mg	3.8628	3.3408	3.0276	3.132	3.5148	4.002	3.48	3.48	0.391249	0.174972	0.174	0.348	-8.34643	-1.65	0.0390811	0.197689	91.6667	1.20278	0.765377	0.4374	0.0729	0.0218679
	TUKEY HSD ANALYSIS
Symbols	Groups comparison		Mean Difference		Square root	Q value	Results
*	Control Vs Toxicant		1.8		1.8	0.613293	*significant
	Control Vs per se		0.02		0.02	0.613293	not significant
α	Control Vs Therapy 1		0.61		0.61	0.613293	not significant
α	Control Vs Therapy 2		0.24		0.24	0.613293	not significant
α	Control Vs Therapy 3		0.12		0.12	0.613293	not significant
α	Control Vs Therapy 4		0.15		0.15	0.613293	not significant
φ	Therapy 1 Vs Therapy 2		-0.37		0.37	0.613293	not significant
φ	Therapy 1 Vs Therapy 3		-0.49		0.49	0.613293	not significant
φ	Therapy 1 Vs Therapy 4		-0.46		0.46	0.613293	not significant
λ	Therapy 2 Vs Therapy 3		-0.12		0.12	0.613293	not significant
λ	Therapy 2 Vs Therapy 4		-0.09		0.09	0.613293	not significant
Ω	Therapy 3 Vs Therapy 4		0.03		0.03	0.613293	not significant
Ѱ	Toxicant Vs Therapy 1		-1.19		1.19	0.613293	*significant
Ѱ	Toxicant Vs Therapy 2		-1.56		1.56	0.613293	*significant
Ѱ	Toxicant Vs Therapy 3		-1.68		1.68	0.613293	*significant
Ѱ	Toxicant Vs Therapy 4		-1.65		1.65	0.613293	*significant
Kidney GPx					Average mean		G/N=	2.28571														F Critical value ANOVA 2.5336
	1	2	3	4	5	6	Cal mean	Mean	SD	SE	0.05	0.1	p value				% Protection	SS total	SS within	SS between	MS between	MS within	Anova F value	Tukey Q value
Control	2.2272	2.4576	2.5856	2.8416	2.944	2.304	2.56	2.56	0.287815	0.128715	0.128	0.256						0.865583	0.414188	0.451396	0.0752327	0.0118339	9.31951	0.433064
Naringenin Per se	2.1924	2.7972	2.268	2.898	2.5452	2.4192	2.52	2.52	0.283318	0.126704	0.126	0.252	0.221467	0.04	0.0326213	0.180614		0.730684	0.401345	0.329339	0.0548898	0.011467
ATD	1.512	1.6968	1.8648	1.932	1.4616	1.6128	1.68	1.68	0.188879	0.0844691	0.084	0.168	5.71591	0.88	0.0237025	0.153956		2.37971	0.178376	2.20134	0.36689	0.00509645
ATD +Naringenin 10 mg	1.818	1.9392	2.2422	2.0402	2.323	1.7574	2.02	2.02	0.227104	0.101564	0.101	0.202	-2.57382	-0.34	0.0174503	0.1321	38.6364	0.681506	0.257881	0.423624	0.0706041	0.00736804
ATD +Naringenin 20 mg	2.0097	2.2176	2.3331	2.5641	2.6565	2.079	2.31	2.31	0.259708	0.116145	0.1155	0.231	-4.38679	-0.63	0.0206247	0.143613	71.5909	0.34078	0.337242	0.00353878	0.000589796	0.00963547
ATD +Naringenin 40 mg	2.3424	2.7084	2.4644	2.196	2.806	2.1228	2.44	2.44	0.274324	0.122681	0.122	0.244	0.453605	0.08	0.0311045	0.176365	86.3636	0.519092	0.376268	0.142824	0.0238041	0.0107505
ATD +Silymarin 50 mg	2.7417	2.8405	2.1489	2.223	2.3712	2.4947	2.47	2.47	0.277697	0.12419	0.1235	0.247	-5.25988	-0.79	0.0225581	0.150194	89.7727	0.589344	0.385577	0.203767	0.0339612	0.0110165
	TUKEY HSD ANALYSIS
Symbols	Groups comparison		Mean Difference		Square root	Q value	Results
*	Control Vs Toxicant		0.88		0.88	0.433064	*significant
	Control Vs per se		0.04		0.04	0.433064	not significant
α	Control Vs Therapy 1		0.54		0.54	0.433064	*significant
α	Control Vs Therapy 2		0.25		0.25	0.433064	not significant
α	Control Vs Therapy 3		0.12		0.12	0.433064	not significant
α	Control Vs Therapy 4		0.09		0.09	0.433064	not significant
φ	Therapy 1 Vs Therapy 2		-0.29		0.29	0.433064	not significant
φ	Therapy 1 Vs Therapy 3		-0.42		0.42	0.433064	not significant
φ	Therapy 1 Vs Therapy 4		-0.45		0.45	0.433064	*significant
λ	Therapy 2 Vs Therapy 3		-0.13		0.13	0.433064	not significant
λ	Therapy 2 Vs Therapy 4		-0.16		0.16	0.433064	not significant
Ω	Therapy 3 Vs Therapy 4		-0.03		0.03	0.433064	not significant
Ѱ	Toxicant Vs Therapy 1		-0.34		0.34	0.433064	not significant
Ѱ	Toxicant Vs Therapy 2		-0.63		0.63	0.433064	*significant
Ѱ	Toxicant Vs Therapy 3		-0.76		0.76	0.433064	*significant
Ѱ	Toxicant Vs Therapy 4		-0.79		0.79	0.433064	*significant
Liver G6PDH					Average mean		G/N=	11.5629														F Critical value ANOVA 2.5336
	1	2	3	4	5	6	Cal mean	Mean	SD	SE	0.05	0.1	p value				% Protection	SS total	SS within	SS between	MS between	MS within	Anova F value	Tukey Q value
Control	13.433	11.97	11.571	12.768	14.763	15.295	13.3	13.3	1.49529	0.668714	0.665	1.33						29.2854	11.1794	18.106	3.01767	0.319413	20.4413	2.21349
Naringenin Per se	12.864	12.06	13.534	13.4	11.658	15.41	14.874	13.4	1.50653	0.673742	0.67	1.34	-0.105345	-0.1	0.901106	0.949266		31.5988	11.3482	20.2506	3.37509	0.324234
ATD	6.576	5.9595	7.8775	7.6035	6.9185	6.165	6.85	6.85	0.77013	0.344413	0.3425	0.685	8.5749	6.45	0.565798	0.752195		136.232	2.9655	133.266	22.211	0.0847286
ATD +Naringenin 10 mg	8.685	8.3955	11.0975	9.7465	10.7115	9.264	9.65	9.65	1.08493	0.485194	0.4825	0.965	-4.70582	-2.8	0.354034	0.595007	43.4109	27.8395	5.88534	21.9541	3.65902	0.168153
ATD +Naringenin 20 mg	10.89	12.221	13.431	10.527	13.915	11.616	12.1	12.1	1.36038	0.608379	0.605	1.21	-7.50963	-5.25	0.488745	0.699103	81.3953	10.9842	9.25311	1.73113	0.288522	0.264375
ATD +Naringenin 40 mg	13.231	11.397	12.576	15.065	14.541	11.79	13.1	13.1	1.4728	0.658658	0.655	1.31	0.318401	0.3	0.887758	0.942209	96.8992	25.0226	10.8458	14.1768	2.36281	0.309879
ATD +Silymarin 50 mg	14.421	10.9098	12.6654	11.286	12.0384	13.9194	12.54	12.54	1.40984	0.630501	0.627	1.254	-7.91997	-5.69	0.516152	0.718437	88.2171	15.6672	9.9383	5.72885	0.954808	0.283951
	TUKEY HSD ANALYSIS
Symbols	Groups comparison		Mean Difference		Square root	Q value	Results
*	Control Vs Toxicant		6.45		6.45	2.21349	*significant
	Control Vs per se		-0.1		0.1	2.21349	not significant
α	Control Vs Therapy 1		3.65		3.65	2.21349	*significant
α	Control Vs Therapy 2		1.2		1.2	2.21349	not significant
α	Control Vs Therapy 3		0.2		0.2	2.21349	not significant
α	Control Vs Therapy 4		0.76		0.76	2.21349	not significant
φ	Therapy 1 Vs Therapy 2		-2.45		2.45	2.21349	*significant
φ	Therapy 1 Vs Therapy 3		-3.45		3.45	2.21349	*significant
φ	Therapy 1 Vs Therapy 4		-2.89		2.89	2.21349	*significant
λ	Therapy 2 Vs Therapy 3		-1		1	2.21349	not significant
λ	Therapy 2 Vs Therapy 4		-0.44		0.44	2.21349	not significant
Ω	Therapy 3 Vs Therapy 4		0.56		0.56	2.21349	not significant
Ѱ	Toxicant Vs Therapy 1		-2.8		2.8	2.21349	*significant
Ѱ	Toxicant Vs Therapy 2		-5.25		5.25	2.21349	*significant
Ѱ	Toxicant Vs Therapy 3		-6.25		6.25	2.21349	*significant
Ѱ	Toxicant Vs Therapy 4		-5.69		5.69	2.21349	*significant
Kidney G6PDH					Average mean		G/N=	6.39714														F Critical value ANOVA 2.5336
	1	2	3	4	5	6	Cal mean	Mean	SD	SE	0.05	0.1	p value				% Protection	SS total	SS within	SS between	MS between	MS within	Anova F value	Tukey Q value
Control	8.5905	6.723	6.4989	7.1712	7.5447	8.2917	7.47	7.47	0.839835	0.375586	0.3735	0.747						10.4328	3.52662	6.90613	1.15102	0.10076	26.8474	1.23203
Naringenin Per se	7.676	6.612	6.84	8.436	7.296	8.74	7.6	7.6	0.854451	0.382122	0.38	0.76	-0.242628	-0.13	0.287082	0.5358		12.3316	3.65043	8.68119	1.44687	0.104298
ATD	2.961	3.1584	3.3229	2.8623	3.6519	3.7835	3.29	3.29	0.369887	0.165419	0.1645	0.329	10.1852	4.18	0.168428	0.4104		58.6101	0.684083	57.926	9.65434	0.0195452
ATD +Naringenin 10 mg	5.1456	4.6632	4.824	5.4136	5.9496	6.164	5.36	5.36	0.602613	0.269497	0.268	0.536	-6.54618	-2.07	0.0999918	0.316215	49.5215	8.2697	1.81571	6.45399	1.07567	0.0518774
ATD +Naringenin 20 mg	6.174	6.5856	7.6146	6.9286	5.9682	7.889	6.86	6.86	0.771254	0.344915	0.343	0.686	-9.33258	-3.57	0.14633	0.382531	85.4067	4.25959	2.97417	1.28542	0.214237	0.0849762
ATD +Naringenin 40 mg	8.372	6.552	7.3528	8.0808	6.3336	6.9888	7.28	7.28	0.818474	0.366033	0.364	0.728	0.604746	0.32	0.279997	0.529148	95.4545	8.02612	3.3495	4.67662	0.779437	0.0957
ATD +Silymarin 50 mg	6.6432	7.6812	6.0204	6.9892	6.228	7.958	6.92	6.92	0.778	0.347932	0.346	0.692	-9.42237	-3.63	0.14842	0.385253	86.8421	4.6667	3.02642	1.64028	0.27338	0.0864692
	TUKEY HSD ANALYSIS
Symbols	Groups comparison		Mean Difference		Square root	Q value	Results
*	Control Vs Toxicant		4.18		4.18	1.23203	*significant
	Control Vs per se		-0.13		0.13	1.23203	not significant
α	Control Vs Therapy 1		2.11		2.11	1.23203	*significant
α	Control Vs Therapy 2		0.61		0.61	1.23203	not significant
α	Control Vs Therapy 3		0.19		0.19	1.23203	not significant
α	Control Vs Therapy 4		0.55		0.55	1.23203	not significant
φ	Therapy 1 Vs Therapy 2		-1.5		1.5	1.23203	*significant
φ	Therapy 1 Vs Therapy 3		-1.92		1.92	1.23203	*significant
φ	Therapy 1 Vs Therapy 4		-1.56		1.56	1.23203	*significant
λ	Therapy 2 Vs Therapy 3		-0.42		0.42	1.23203	not significant
λ	Therapy 2 Vs Therapy 4		-0.06		0.06	1.23203	not significant
Ω	Therapy 3 Vs Therapy 4		0.36		0.36	1.23203	not significant
Ѱ	Toxicant Vs Therapy 1		-2.07		2.07	1.23203	*significant
Ѱ	Toxicant Vs Therapy 2		-3.57		3.57	1.23203	*significant
Ѱ	Toxicant Vs Therapy 3		-3.99		3.99	1.23203	*significant
Ѱ	Toxicant Vs Therapy 4		-3.63		3.63	1.23203	*significant
Albumin					Average mean		G/N=	3.88143														F Critical value ANOVA 2.5336
	1	2	3	4	5	6	Cal mean	Mean	SD	SE	0.05	0.1	p value				% Protection	SS total	SS within	SS between	MS between	MS within	Anova F value	Tukey Q value
Control	4.2528	4.9173	3.8541	4.4743	3.987	5.0945	4.43	4.43	0.498055	0.222737	0.2215	0.443						3.04588	1.24029	1.80558	0.300931	0.035437	6.16748	0.733278
Naringenin Per se	4.1856	3.924	3.7932	4.8396	4.4036	5.014	4.36	4.36	0.490185	0.219217	0.218	0.436	0.223987	0.07	0.097668	0.312519		2.57559	1.20141	1.37418	0.229031	0.0343259
ATD	2.979	3.3431	2.8797	3.8065	3.6741	3.1776	3.31	3.31	0.372136	0.166424	0.1655	0.331	4.02813	1.12	0.0773088	0.278045		2.65161	0.692426	1.95918	0.326531	0.0197836
ATD +Naringenin 10 mg	3.3936	3.024	2.9232	3.7296	3.864	3.2256	3.36	3.36	0.377757	0.168938	0.168	0.336	-0.210843	-0.05	0.0562371	0.237144	4.46429	2.34483	0.713503	1.63133	0.271888	0.0203858
ATD +Naringenin 20 mg	3.5808	3.357	3.2451	4.1403	3.7673	4.2895	3.73	3.73	0.419356	0.187541	0.1865	0.373	-1.67506	-0.42	0.0628688	0.250737	37.5	1.01688	0.879295	0.137584	0.0229306	0.0251227
ATD +Naringenin 40 mg	3.7536	3.4017	3.519	4.4965	3.9491	4.3401	3.91	3.91	0.439593	0.196592	0.1955	0.391	1.52824	0.45	0.0867046	0.294456	53.5714	0.971106	0.966208	0.00489796	0.000816327	0.0276059
ATD +Silymarin 50 mg	3.9072	4.5177	3.5409	4.6805	4.1107	3.663	4.07	4.07	0.457581	0.204636	0.2035	0.407	-2.88133	-0.76	0.0695731	0.263767	67.8571	1.26026	1.0469	0.213355	0.0355592	0.0299115
	TUKEY HSD ANALYSIS
Symbols	Groups comparison		Mean Difference		Square root	Q value	Results
*	Control Vs Toxicant		1.12		1.12	0.733278	*significant
	Control Vs per se		0.07		0.07	0.733278	not significant
α	Control Vs Therapy 1		1.07		1.07	0.733278	*significant
α	Control Vs Therapy 2		0.7		0.7	0.733278	not significant
α	Control Vs Therapy 3		0.52		0.52	0.733278	not significant
α	Control Vs Therapy 4		0.36		0.36	0.733278	not significant
φ	Therapy 1 Vs Therapy 2		-0.37		0.37	0.733278	not significant
φ	Therapy 1 Vs Therapy 3		-0.55		0.55	0.733278	not significant
φ	Therapy 1 Vs Therapy 4		-0.71		0.71	0.733278	not significant
λ	Therapy 2 Vs Therapy 3		-0.18		0.18	0.733278	not significant
λ	Therapy 2 Vs Therapy 4		-0.34		0.34	0.733278	not significant
Ω	Therapy 3 Vs Therapy 4		-0.16		0.16	0.733278	not significant
Ѱ	Toxicant Vs Therapy 1		-0.05		0.05	0.733278	not significant
Ѱ	Toxicant Vs Therapy 2		-0.42		0.42	0.733278	not significant
Ѱ	Toxicant Vs Therapy 3		-0.6		0.6	0.733278	not significant
Ѱ	Toxicant Vs Therapy 4		-0.76		0.76	0.733278	*significant
IGF1					Average mean		G/N=	1053														F Critical value ANOVA 2.5336
	1	2	3	4	5	6	Cal mean	Mean	SD	SE	0.05	0.1	p value				% Protection	SS total	SS within	SS between	MS between	MS within	Anova F value	Tukey Q value
Control	1106.1	1241.29	1364.19	1413.35	1069.23	1179.84	1229	1229	138.174	61.7932	61.45	122.9						281316	95459.9	185856	30976	4772.99	5.12437	236.326
ATD	764.1	942.39	976.35	857.49	815.04	738.63	849	849	95.4512	42.6871	42.45	84.9	5.05966	380	5640.58	75.1038		295251	45554.6	249696	41616	2277.73
ATD +Nar	957.6	1074.64	1021.44	1223.6	1181.04	925.68	1064	1064	119.623	53.4971	53.2	106.4	-3.14141	-215	4684.12	68.4407	56.5789	72274.5	71548.5	726	121	3577.42
ATD +Silymarin 50 mg	963	1080.7	1230.5	1187.7	930.9	1027.2	1070	1070	120.298	53.7988	53.5	107	-3.21798	-221	4716.49	68.6767	58.1579	74091.7	72357.7	1734	289	3617.88
	TUKEY HSD ANALYSIS
Symbols	Groups comparison		Mean Difference		Square root	Q value	Results
*	Control Vs Toxicant		380		380	236.326	*significant
α	Control Vs Therapy 1		165		165	236.326	not significant
α	Control Vs Therapy 2		159		159	236.326	not significant
φ	Therapy 1 Vs Therapy 2		-6		6	236.326	not significant
Ѱ	Toxicant Vs Therapy 1		-215		215	0.997475	*significant
Ѱ	Toxicant Vs Therapy 2		-221		221	0.997475	*significant
IL6					Average mean		G/N=	95.95														F Critical value ANOVA 2.5336
	1	2	3	4	5	6	Cal mean	Mean	SD	SE	0.05	0.1	p value				% Protection	SS total	SS within	SS between	MS between	MS within	Anova F value	Tukey Q value
Control	76.125	88.375	78.75	97.125	100.625	84	87.5	87.5	9.83743	4.39943	4.375	8.75						912.29	483.875	428.415	71.4025	24.1938	3.7825	21.4879
ATD	131.1	102.6	99.18	109.44	115.14	126.54	114	114	12.8168	5.73183	5.7	11.4	-3.66753	-26.5	52.2089	7.22557		2776.16	821.347	1954.81	325.802	41.0674
ATD +Nar	78.387	81.09	91.001	86.496	103.615	100.011	90.1	90.1	10.1297	4.53016	4.505	9.01	3.27133	23.9	53.3762	7.3059	90.1887	718.393	513.058	205.335	34.2225	25.6529
ATD +Silymarin 50 mg	82.98	93.122	102.342	80.214	106.03	88.512	92.2	92.2	10.3658	4.63574	4.61	9.22	2.9572	21.8	54.344	7.37184	82.2642	621.628	537.253	84.375	14.0625	26.8627
	TUKEY HSD ANALYSIS
Symbols	Groups comparison		Mean Difference		Square root	Q value	Results
*	Control Vs Toxicant		-26.5		26.5	21.4879	*significant
α	Control Vs Therapy 1		-2.6		2.6	21.4879	not significant
α	Control Vs Therapy 2		-4.7		4.7	21.4879	not significant
φ	Therapy 1 Vs Therapy 2		-2.1		2.1	21.4879	not significant
Ѱ	Toxicant Vs Therapy 1		23.9		23.9	21.4879	*significant
Ѱ	Toxicant Vs Therapy 2		21.8		21.8	21.4879	*significant
